# Supplementary material for: Breastfeeding Practices and Associated Factors in Shanghai: A Cross-Sectional Study
Source: MDPI journal article supplement (doi:10.3390/nu14204429), 2022-10-21
Supplement: s1 [file s1]

**Table S1. Multiple channels among mother exposure to formula milk marketing at different stage(N=1677)**

|                            | <b>Promotions in<br/>supermarkets or<br/>maternity stores</b> | <b>Digital marketing.<br/>websites/WeChat/APPs,<br/>mass media, etc</b> | <b>Recommended by<br/>relatives and<br/>friends</b> | <b>Health professionals'<br/>recommendations</b> | <b>Other<br/>channel</b> | <b>Percentage of women<br/>exposed to formula<br/>milk marketing</b> |
|----------------------------|---------------------------------------------------------------|-------------------------------------------------------------------------|-----------------------------------------------------|--------------------------------------------------|--------------------------|----------------------------------------------------------------------|
| <b>Pre-<br/>conception</b> | 18.6%(312)                                                    | 18.0%(301)                                                              | 8.1%(135)                                           | 1.0%(17)                                         | 0.8%(13)                 | 28.3%(474)                                                           |
| <b>Pregnancy</b>           | 57.7%(967)                                                    | 52.1%(873)                                                              | 30.1%(505)                                          | 5.2%(87)                                         | 11.5%(193)               | 95.5%(1,602)                                                         |
| <b>Postnatal</b>           | 58.6%(982)                                                    | 55.0%(922)                                                              | 31.3%(525)                                          | 7.2%(121)                                        | 10.0%(168)               | 96.2%(1,614)                                                         |

**Table S2. Women’s infant feeding intentions during prenatal and different feeding practices (N=1677)**

|                             | EBF*       | MixMF†     | Artificial feeding |
|-----------------------------|------------|------------|--------------------|
|                             | n (%)      | n (%)      | n (%)              |
| Antenatal feeding intention |            |            |                    |
| Exclusive breastfeeding     | 591(58.1)  | 158 (15.3) | 287 (27.6)         |
| Mixed milk feeding          | 100 (19.5) | 239 (46.6) | 174 (33.9)         |
| Artificial feeding          | 0 (0.0)    | 1 (6.3)    | 15 (93.7)          |
| No plan                     |            |            |                    |

\*EBF, exclusively breastfeeding; †MixMF, mixed milk feeding

**Table S3. Detailed Reasons for women's infant feeding intentions during prenatal (N=1677)**

|                                                                                 | <b>N</b> | <b>Percentage(%)</b> |
|---------------------------------------------------------------------------------|----------|----------------------|
| <b>Reasons for intention of exclusive breastfeeding</b> (select all that apply) | 1036     |                      |
| Exclusive breastfeeding is more hygienic, convenient, and economical            | 853      | 82.3                 |
| Exclusive breastfeeding is the best choice for children                         | 631      | 60.9                 |
| Breastfeeding strengthens the mother-infant bond                                | 634      | 61.2                 |
| Infant formula is bad for children's health                                     | 127      | 12.3                 |
| Other reasons                                                                   | 9        | 0.9                  |
| <b>Reasons for intention of mixed milk feeding</b> (select all that apply)      | 513      |                      |
| Fear of breast milk insufficiency                                               | 402      | 78.4                 |
| Return to work                                                                  | 205      | 40.0                 |
| Formula milk is as good as breast milk                                          | 82       | 16.0                 |
| Poor health status                                                              | 45       | 8.8                  |
| Friends/colleagues are mixed feeding their children                             | 112      | 21.8                 |
| Other reasons                                                                   | 15       | 2.9                  |
| <b>Reasons for intention of not breastfed</b> (select all that apply)           | 16       |                      |

|                                                                               |     |      |
|-------------------------------------------------------------------------------|-----|------|
| Poor health status                                                            | 2   | 12.5 |
| Return to work                                                                | 1   | 6.3  |
| Infant formula is as good as breast milk                                      | 1   | 6.3  |
| Worries about their body or breasts will be out of shape due to breastfeeding | 3   | 18.8 |
| Miserable breastfeeding experience                                            | 3   | 18.8 |
| Unwilling to breastfeed in public spaces                                      | 1   | 6.3  |
| Other reasons                                                                 | 7   | 43.8 |
| No Plan                                                                       | 112 |      |
